# Supplementary material
Source: PubMed Central journal article supplement (PMC9207436)
Supplement: 726_2022_3175_MOESM1_ESM.pdf [file 726_2022_3175_MOESM1_ESM.pdf]

## Supplementary Information

### Deciphering the Conformational Landscape of Few Selected Aromatic Noncoded Amino acids (NCAAs) for Applications in Rational Design of Peptide Therapeutics.

Lalita Mohan Behera<sup>1</sup>, Manaswini Ghosh<sup>1</sup>, Soumendhra Rana\*<sup>1</sup>

<sup>1</sup>Chemical Biology Laboratory, School of Basic Sciences, Indian Institute of Technology Bhubaneswar, Odisha 752050, India. Email: [soumendhra@iitbbs.ac.in](mailto:soumendhra@iitbbs.ac.in)

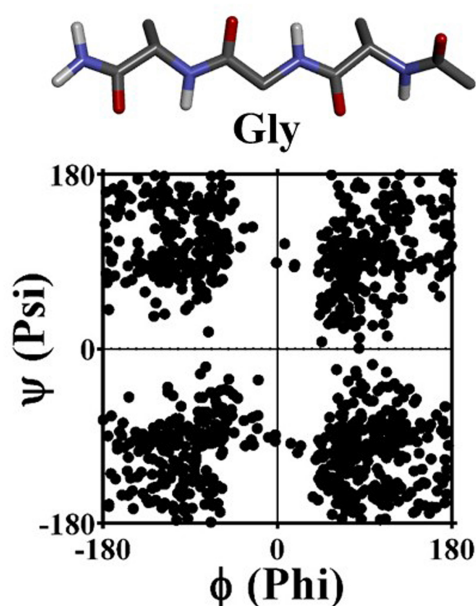

**Figure S1.** Ramachandran plot illustrating the backbone conformational propensity of Gly in Ac-Ala-Gly-Ala-NH<sub>2</sub> tripeptide obtained from MD over 10 ns at 300K.

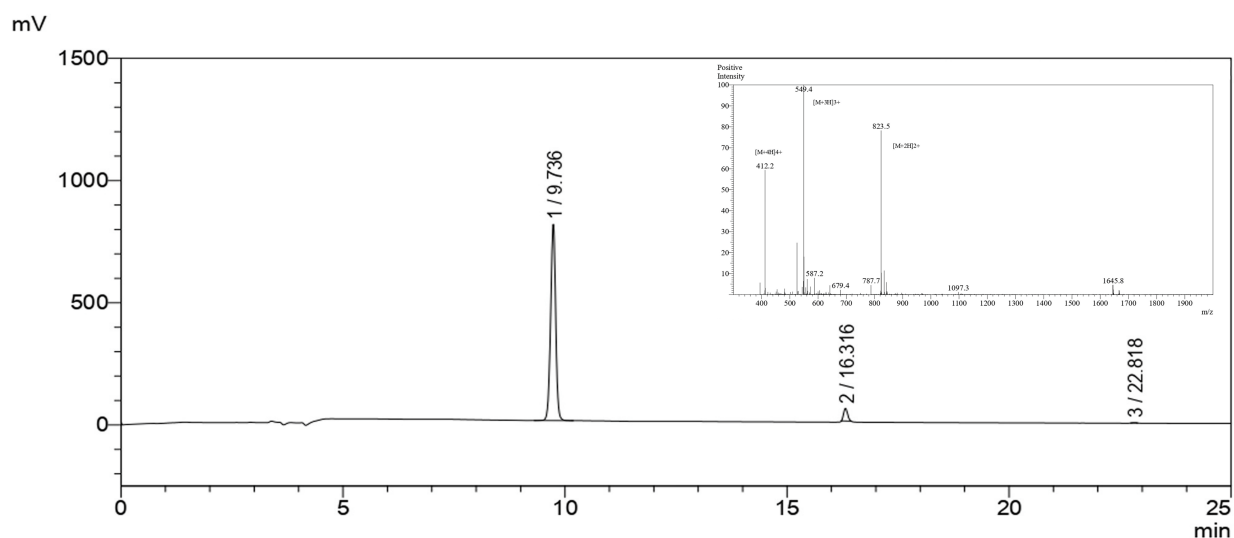

**Figure S2.** Analytical HPLC profile and the ESI-mass spectra (inset) of the Hed1 peptide.

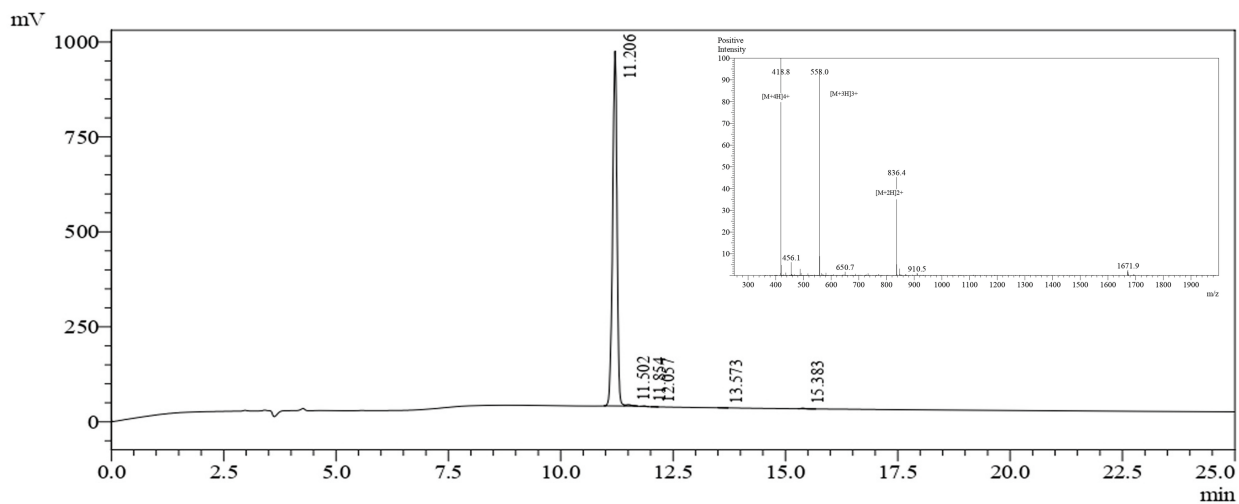

**Figure S3.** Analytical HPLC profile and the ESI-mass spectra (inset) of the Hed2 peptide.

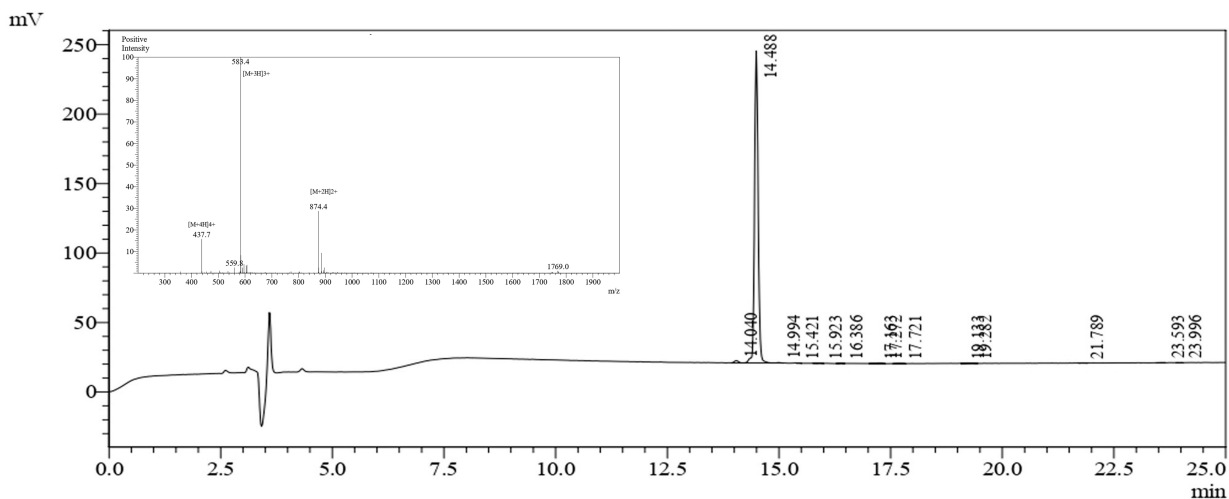

**Figure S4.** Analytical HPLC profile and the ESI-mass spectra (inset) of the Hed3 peptide.

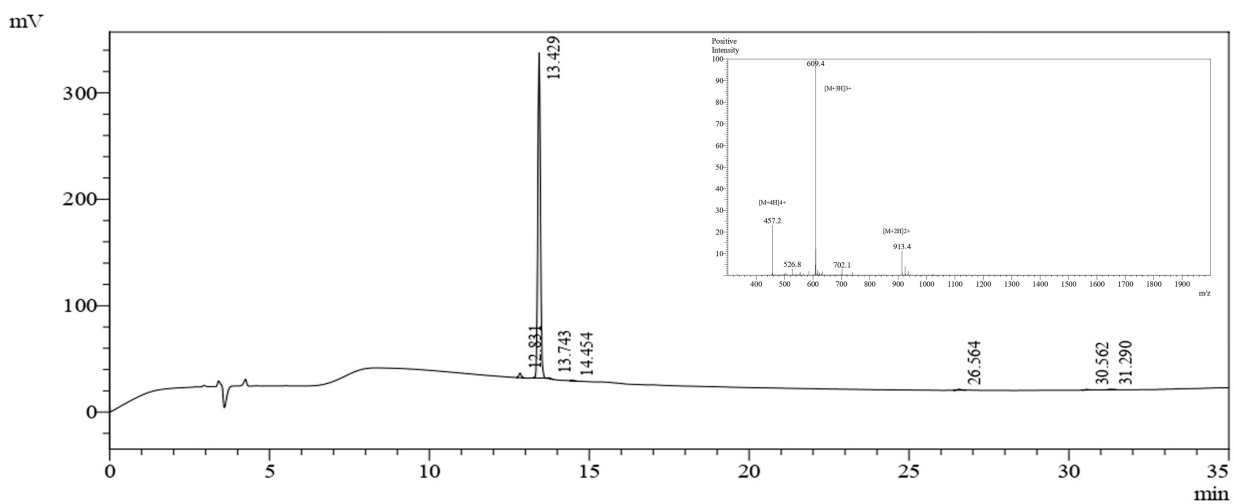

**Figure S5.** Analytical HPLC profile and the ESI-mass spectra (inset) of the Hed4 peptide.

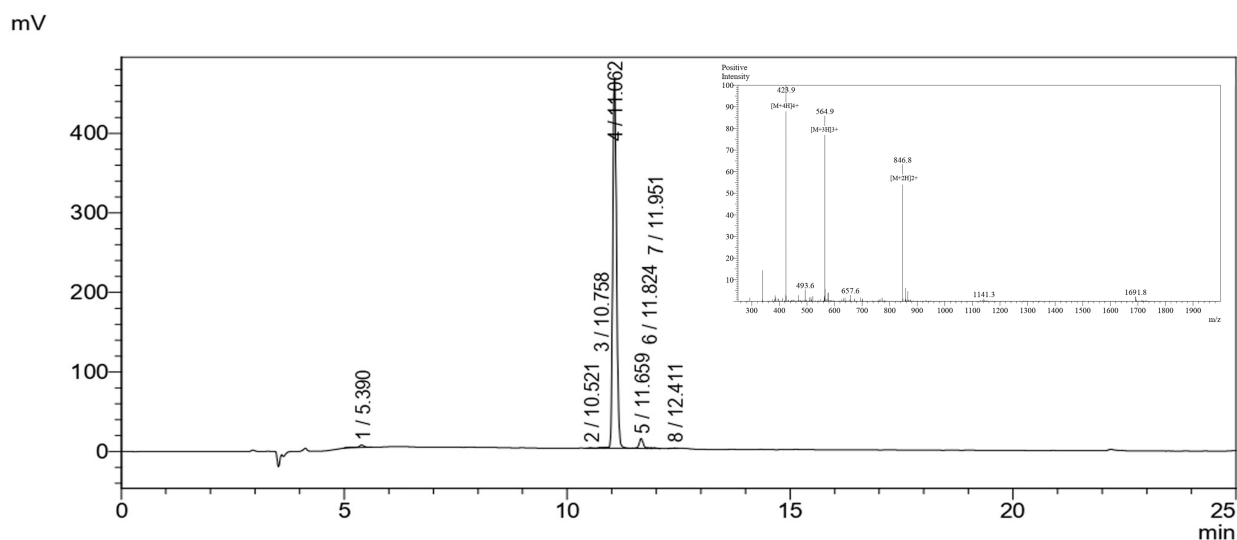

**Figure S6.** Analytical HPLC profile and the ESI-mass spectra (inset) of the Hed5 peptide.

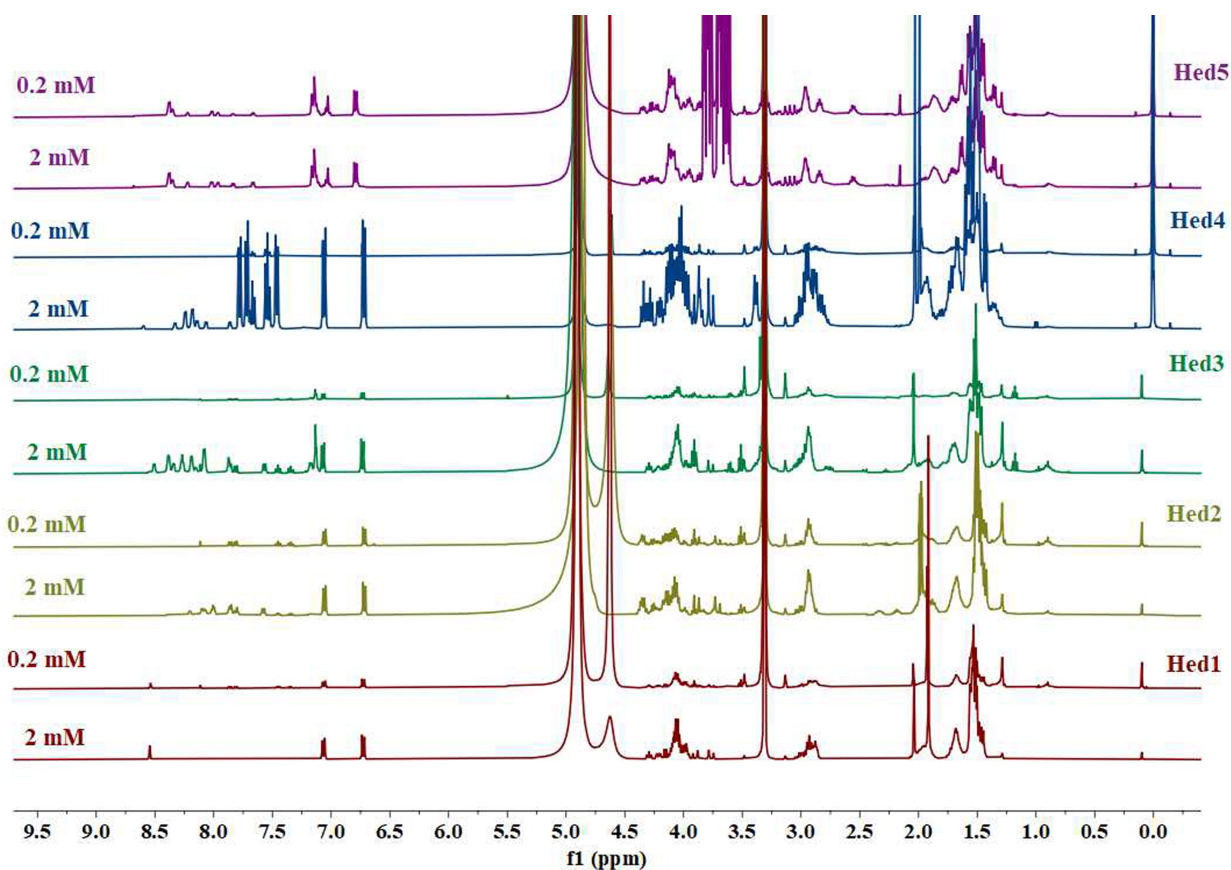

**Figure S7.** <sup>1</sup>H NMR spectra of the Hed1 to Hed5 peptide, respectively recorded at 2 mM and 0.2 mM concentrations in CD<sub>3</sub>OD at 298 K.

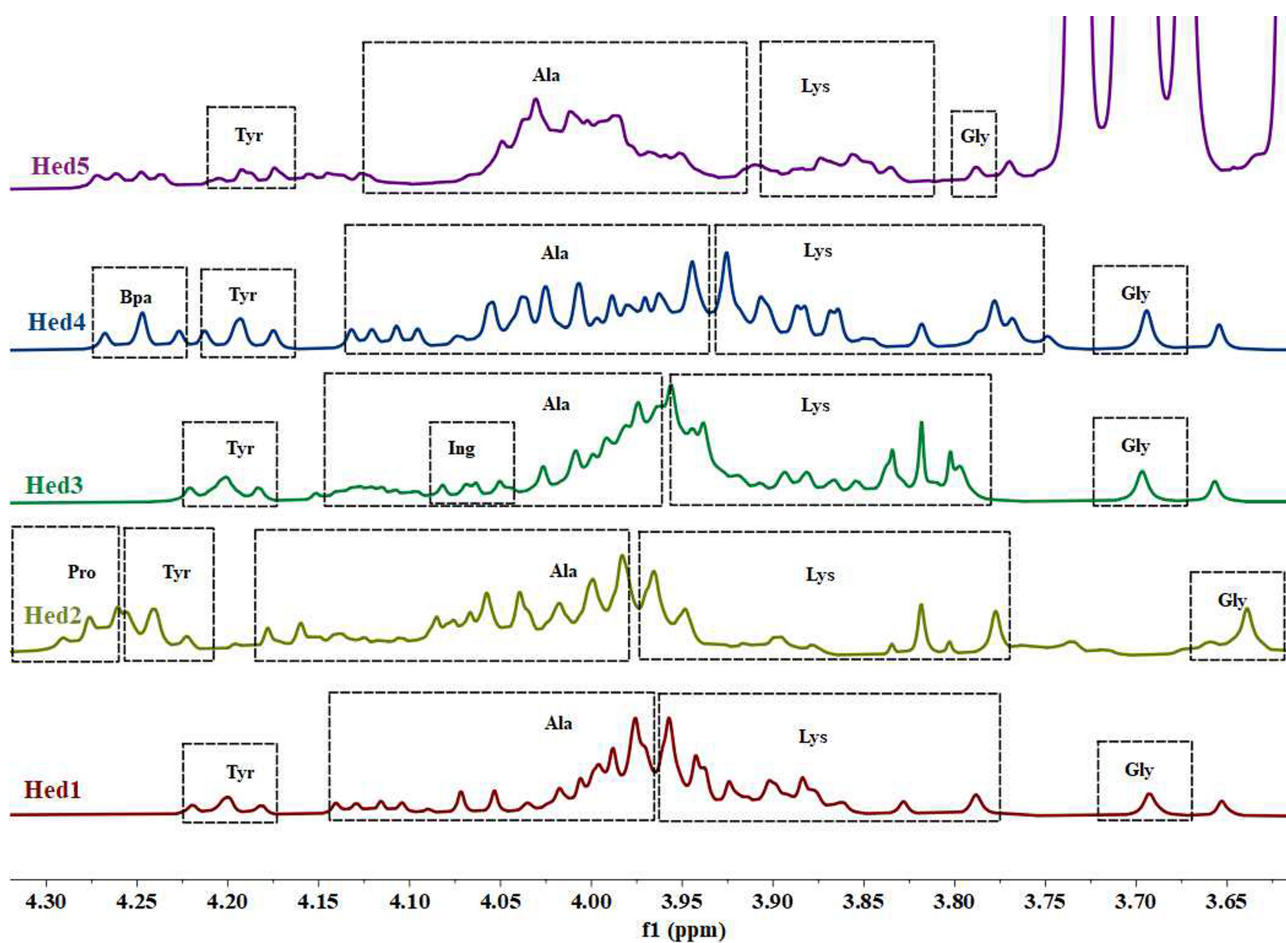

**Figure S8.** <sup>1</sup>H NMR spectra showing the C<sub>α</sub>H region of the peptides. The dotted boxes indicate different residue regions for each peptide.

**Table S1.** Percentage helicity of the peptides calculated in the presence of various solvents and cosolvents. The ratio of 222/208 is provided within the parenthesis as an indicator to judge the type of helix populated in the solution.

| Solvent         | % Helicity and $[\theta]_{\text{MRE}}^{222}/[\theta]_{\text{MRE}}^{208}$ |            |            |            |            |
|-----------------|--------------------------------------------------------------------------|------------|------------|------------|------------|
|                 | Hed1                                                                     | Hed2       | Hed3       | Hed4       | Hed5       |
| <b>PBS</b>      | 42 (0.6)                                                                 | 0          | 27 (0.7)   | 0          | 16 (0.6)   |
| <b>Water</b>    | 28.6 (0.7)                                                               | 0          | 20.8 (0.6) | 9.4 (0.6)  | 14.7 (0.6) |
| <b>Methanol</b> | 47.4 (0.7)                                                               | 28 (0.7)   | 45.2 (0.7) | 11.3 (0.7) | 43 (0.7)   |
| <b>20% TFE</b>  | 42.5 (0.9)                                                               | 15.7 (0.4) | 48.9 (0.8) | 12.4 (0.8) | 21.3 (1.0) |
| <b>30% TFE</b>  | 46.9 (0.8)                                                               | 24.1 (0.6) | 53.4 (0.8) | 12.2 (0.9) | 20.3 (1)   |
| <b>20% HFIP</b> | 62.7 (0.8)                                                               | 47.6 (0.8) | 42.2 (0.8) | 11 (0.8)   | 18 (0.7)   |
| <b>30% HFIP</b> | 67 (0.8)                                                                 | 47.5 (0.8) | 46.7 (0.8) | 14.4 (0.8) | 17.9 (1.0) |
| <b>20mM SDS</b> | 46 (0.8)                                                                 | 43.8 (0.9) | 43.5 (0.9) | 12.9 (1.0) | 21.2 (1.0) |
| <b>30mM SDS</b> | 48 (0.8)                                                                 | 44.6 (0.9) | 44.6 (0.9) | 13.2 (1.1) | 27.3 (0.9) |
